# Supplementary material for: Zika Virus–Associated Cognitive Impairment in Adolescent, 2016
Source: PubMed Central journal article supplement (PMC5443451; doi:10.3201/eid2306.162029), 2017-06
Supplement: 16-2029-Techapp-s1.pdf [file 16-2029-Techapp-s1.pdf]

# Zika Virus–Associated Cognitive Impairment in Adolescent, 2016

## Technical Appendix

**Technical Appendix Table 1.** Outpatient laboratory evaluation of acute illness and mental status changes in an adolescent returning from a Zika endemic territory

| Date                                         | Test (units)                        | Result                | Reference |
|----------------------------------------------|-------------------------------------|-----------------------|-----------|
| 8/6/16*                                      | EBV EBNA (U/ml)                     | 75.4 (H)              | 0–21.9    |
|                                              | EBV VCA IgG (U/ml)                  | 100 (H)               | 0–21.9    |
|                                              | EBV VCA IgM (U/ml)                  | <10                   | 0–43.9    |
|                                              | EBV IgG (U/ml)                      | 9.3                   | 0–10.9    |
|                                              | Mycoplasma IgG (U/L)                | .02                   | <0.09     |
|                                              | Mycoplasma IgM (U/L)                | .21 U/L               | <0.76     |
|                                              | Parvovirus IgG (IV)                 | 5.73 (H)              | <0.89     |
|                                              | Parvovirus IgM (IV)                 | .24                   | <0.89     |
|                                              | Antinuclear antibody                | Negative              | Negative  |
|                                              | Antistreptolysin O Titer (IU/ml)    | 63                    | 0–330     |
|                                              | DNase B antibody (U/ml)             | 169                   | 0–310     |
|                                              | Sedimentation rate (mm/hr)          | 8                     | 0–24      |
|                                              | Thyroid stimulating hormone (uH/mL) | 1.2                   | .4 – 4.2  |
|                                              | Vitamin B12 (pg/ml)                 | 406                   | 211–911   |
|                                              | Folate (ng/mL)                      | 10.17                 | 4–1000    |
|                                              | Vitamin D 25 Hydroxy (NG/ml)        | 42.5                  | 30–100    |
|                                              | 8/6/16†                             | Lyme Western Blot IgM | Negative  |
| Lyme Western Blot IgG                        |                                     | Negative              | Neg       |
| Serum N methyl D Aspartate Receptor Antibody |                                     | <1:10                 | <1:10     |
| 8/6/16‡                                      | Zika Serum RT-PCR                   | Negative              | Negative  |
|                                              | Zika Serology (IgM)                 | Negative              | Negative  |
|                                              | Zika Urine RT-PCR                   | Positive              | Negative  |

\*Labs performed at Mount Sinai Beth Israel Laboratory.

†Labs performed at an outside hospital laboratory.

‡Labs performed at New York Department of Health.

**Technical Appendix Table 2.** Inpatient laboratory evaluation of acute illness and mental status changes in an adolescent returning from a Zika endemic territory

| Date     | Test                                            | Result    | Reference  |
|----------|-------------------------------------------------|-----------|------------|
| Serum    | Urine toxicology                                | Negative  | Negative   |
|          | 8/16/16*                                        |           |            |
|          | C-Reactive Protein (mg/L)                       | <0.15     | 0–10       |
|          | Sedimentation rate (mm/hr)                      | 10        | 0–20       |
|          | Dengue Fever Virus Antibody IgM (IV)            | 2.15 (H)  | <1.64      |
|          | Dengue Fever Virus Antibody IgG (IV)            | 14 (H)    | <1.64      |
|          | Total IgG (mg/dL)                               | 941       | 714 - 1711 |
| CSF      | CSF Cell Count (cells/microliter)               | 8 WBCs    | 0 - 5      |
|          | 8/18/16*                                        | 1000 RBCs | 0          |
|          | CSF Glucose (mg/dL)                             | 55 (L)    | 60 - 80    |
|          | CSF IgG and Total Protein Ratio                 | 6.7       | 6–13       |
|          | BioFire® Meningitis/Encephalitis RT- PCR Panel  | Negative  | Negative   |
|          | Oligoclonal Bands                               | Negative  | Negative   |
| 8/18/16* | CSF N methyl D Aspartate Receptor Antibody, IgG | Negative  | Negative   |
| 8/18/16† | CSF Zika RT-PCR                                 | Negative  | Negative   |
|          | CSF Zika IgM                                    | Positive  | Negative   |

\*Labs performed at New York Presbyterian Columbia.

†Labs performed at New York Department of Health.

**Technical Appendix Table 3.** Neuropsychological test findings

| Intellectual Function                          | Score          | Percentile |
|------------------------------------------------|----------------|------------|
| Wechsler Intelligence Scale for Children - 5   | Standard Score | Percentile |
| Verbal Comprehension                           | 118            | 88         |
| Visual Spatial                                 | 117            | 87         |
| Fluid Reasoning                                | 118            | 88         |
| Working Memory                                 | 115            | 84         |
| Processing Speed                               | 83             | 13         |
| General Ability Index                          | 121            | 92         |
| Memory and Learning                            |                |            |
| California Verbal Learning Test for Children   | T/z-score      | Percentile |
| Trials 1-5                                     | 45             | 34         |
| Long Delay Free Recall                         | 0              | 50         |
| NEPSY - 2                                      | Scaled Score   | Percentile |
| Memory for Designs                             | 12             | 75         |
| Memory for Designs-Delayed                     | 13             | 84         |
| Rey Complex Figure Test                        | T-score        | Percentile |
| Immediate Recall                               | 29             | 2          |
| Delayed Recall                                 | 24             | 1          |
| Recognition                                    | 27             | 1          |
| Wide Range Assessment of Memory and Learning 2 | Scaled Score   | Percentile |
| Story Memory                                   | 11             | 63         |
| Story Memory Delay Recall                      | 12             | 75         |
| Story Memory Recognition                       | 14             | 91         |
| Executive Functions                            |                |            |
| Delis-Kaplan Executive Function System         | Scaled Score   | Percentile |
| Verbal Fluency                                 |                |            |
| Letter                                         | 14             | 91         |
| Category                                       | 12             | 75         |
| Switching                                      | 13             | 84         |
| Trail Making                                   |                |            |
| Visual Scanning                                | 7              | 16         |
| Number Sequencing                              | 10             | 50         |
| Letter Sequencing                              | 12             | 75         |
| Number-Letter Switching                        | 8              | 25         |
| Motor Speed                                    | 10             | 50         |
| Color Word Interference                        |                |            |
| Color Naming                                   | 9              | 37         |
| Word Reading                                   | 11             | 63         |
| Inhibition                                     | 8              | 25         |
| Inhibition - Total Errors                      | 8              | 25         |
| Inhibition/Switching                           | 9              | 37         |
| Inhibition/Switching - Total Errors            | 10             | 50         |
| Tower                                          |                |            |
| Total Achievement Score                        | 13             | 84         |
| Mean First Move Time                           | 13             | 84         |
| Time-Per-Move Ratio                            | 11             | 63         |
| Move Accuracy Ratio                            | 8              | 25         |

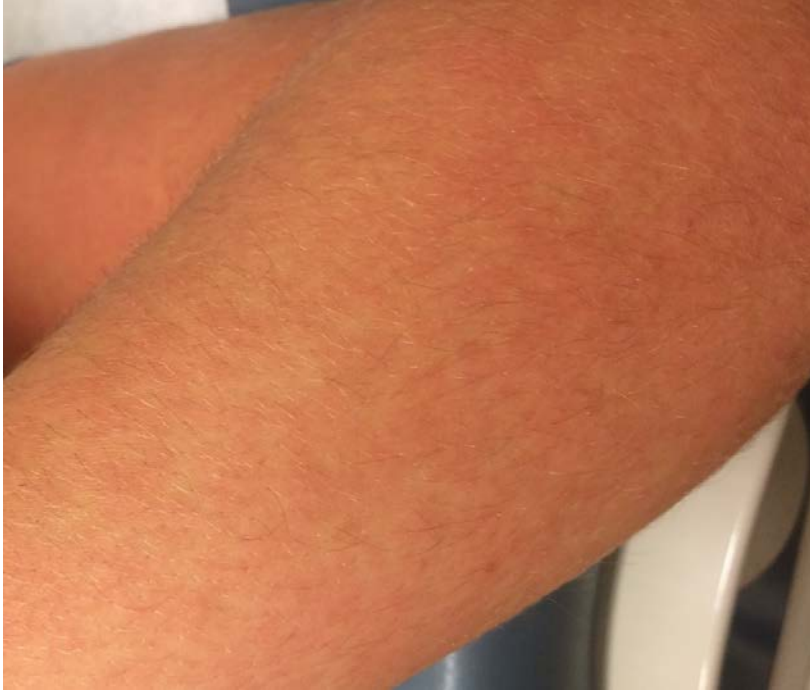

**Technical Appendix Figure 1.** Scarlitiform rash in a patient with urine positive for Zika virus on reverse transcription PCR. Picture taken 4 days after the onset of symptoms.

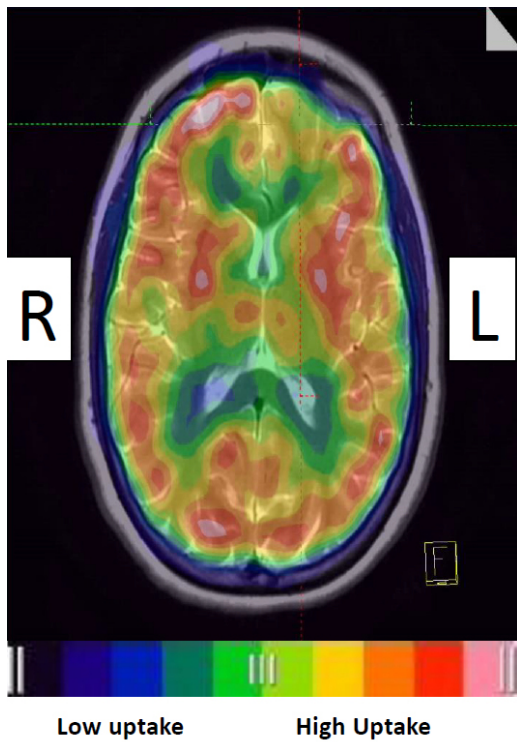

**Technical Appendix Figure 2.** This  $^{99m}\text{Tc}$ -ethyl cysteinyl dimer (ECD) fusion of brain SPECT and MRI shows the localization of focal left inferofrontal lobe moderate-severely decreased hypoperfusion (crosshairs), along with a non-specific heterogeneous global uptake pattern.
